# Supplementary material for: Polarity-extended quantitative analysis of bear bile and its analogues using serially coupled reversed phase-hydrophilic interaction liquid chromatography-tailored multiple reaction monitoring
Source: Royal Society of Chemistry journal article supplement (doi:10.1039/c7ra10229a), 2017-01-01
Supplement: c7ra10229a1.pdf [file c7ra10229a1.pdf]

# Supplemental information

## Figure legend

**Fig. S1** Overlaid extracted ion current chromatogram for the analogues of bear bile, including artificial cow-bezoar, natural cow-bezoar, geese bile, goat bile, cattle bile, yak bile and chicken bile.

**Fig. S2** Hierarchical clustering tree for quantitative properties of bear bile samples (BB1–10) along with their analogues, including artificial cow-bezoar, natural cow-bezoar, geese bile, goat bile, cattle bile, yak bile and chicken bile.

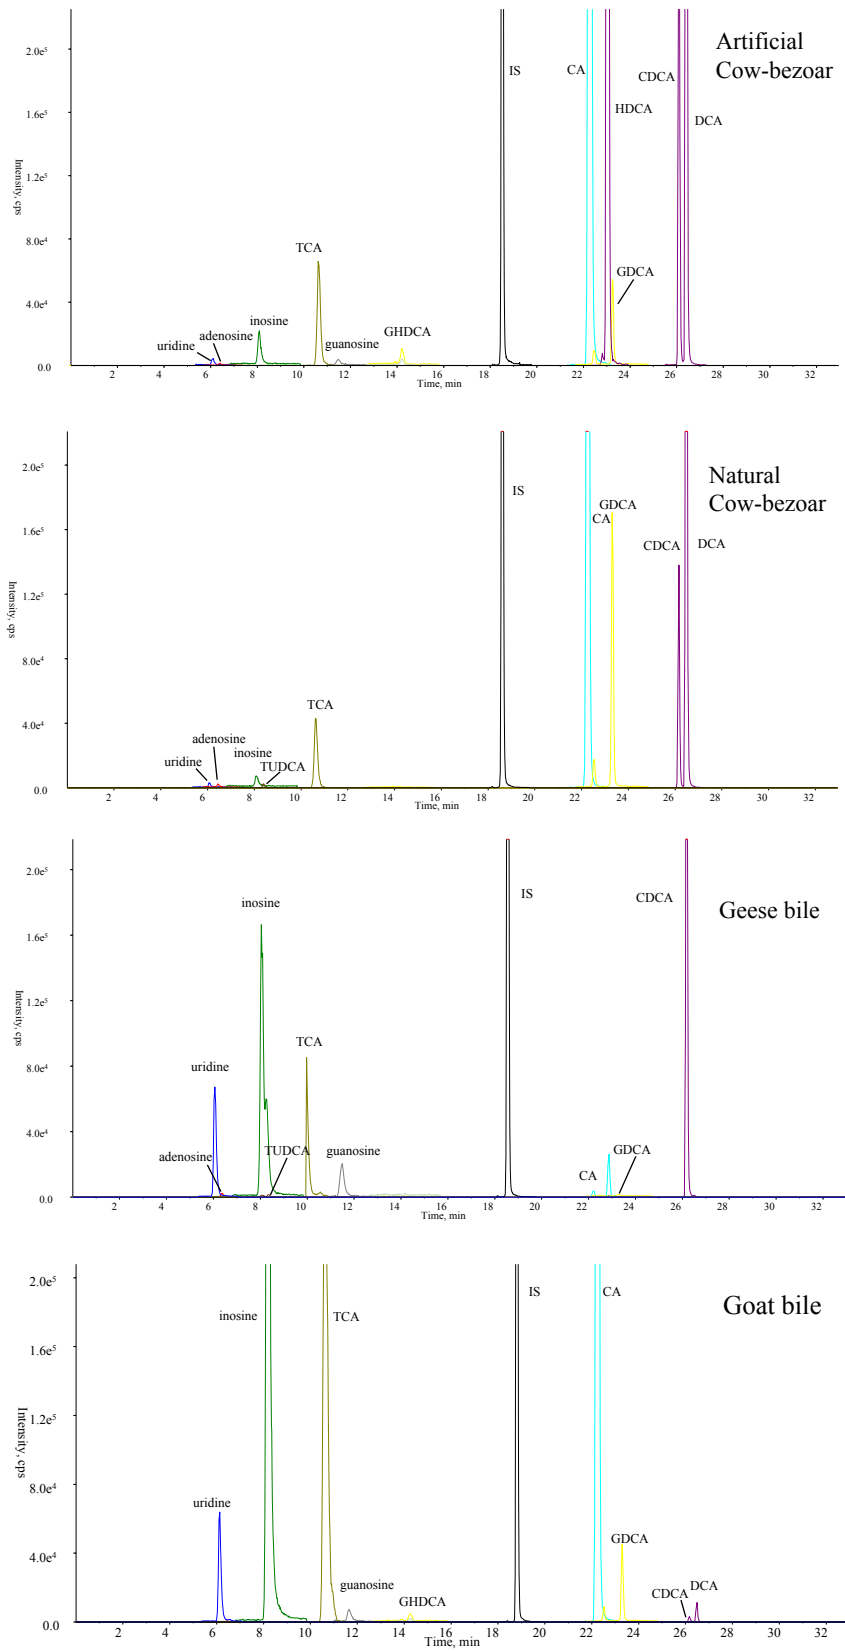

**Fig. S1**

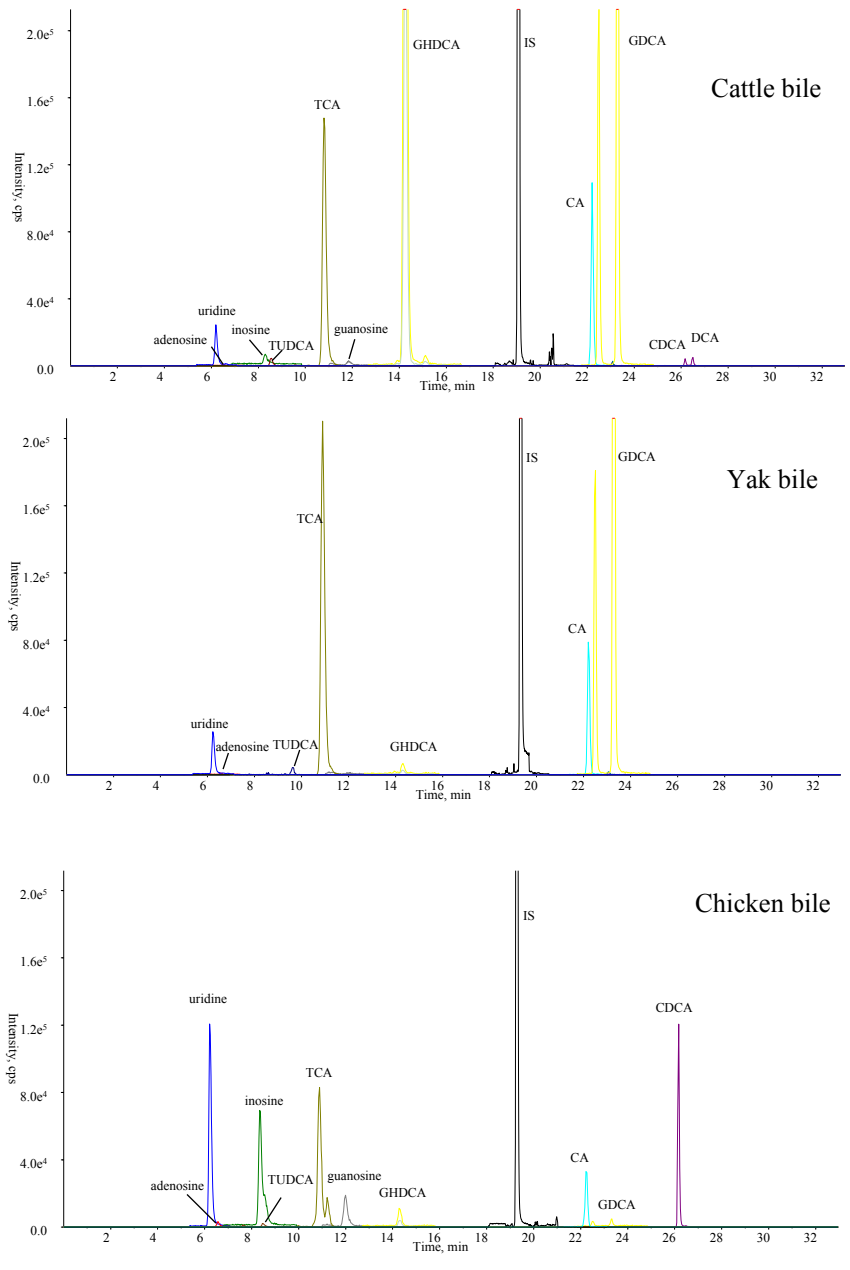

**Fig. S1 (Continued)**

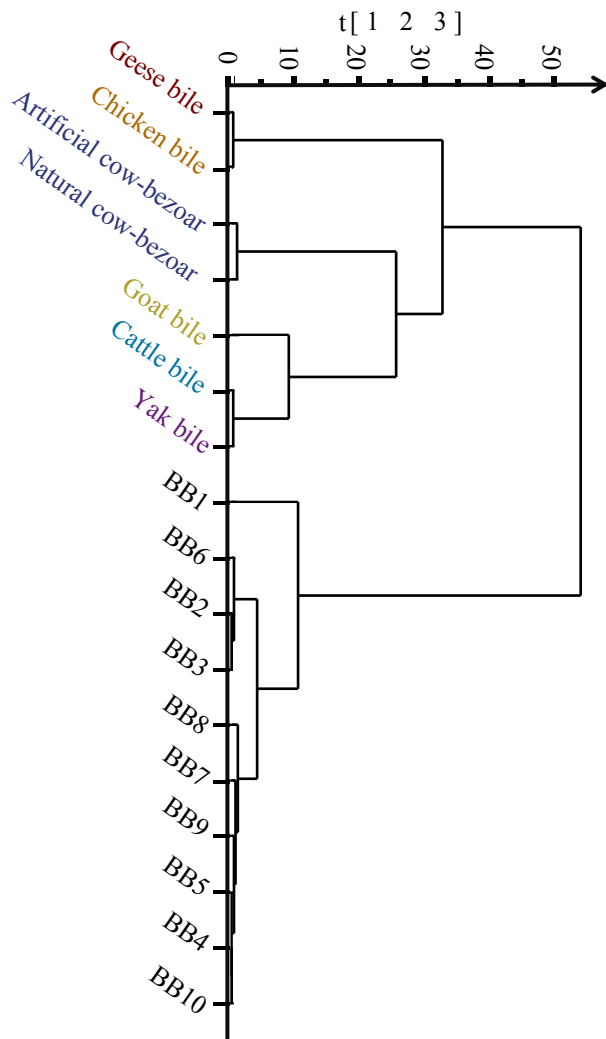

**Fig. S2**
